# Supplementary figures and images for: Microbial community gene expression in ocean surface waters
Source: HighWire-hosted journal article supplement (doi:10.1073/pnas.0708897105), 2008-03-03

Probability distribution of # of DNA reads assigned to a GOS cluster

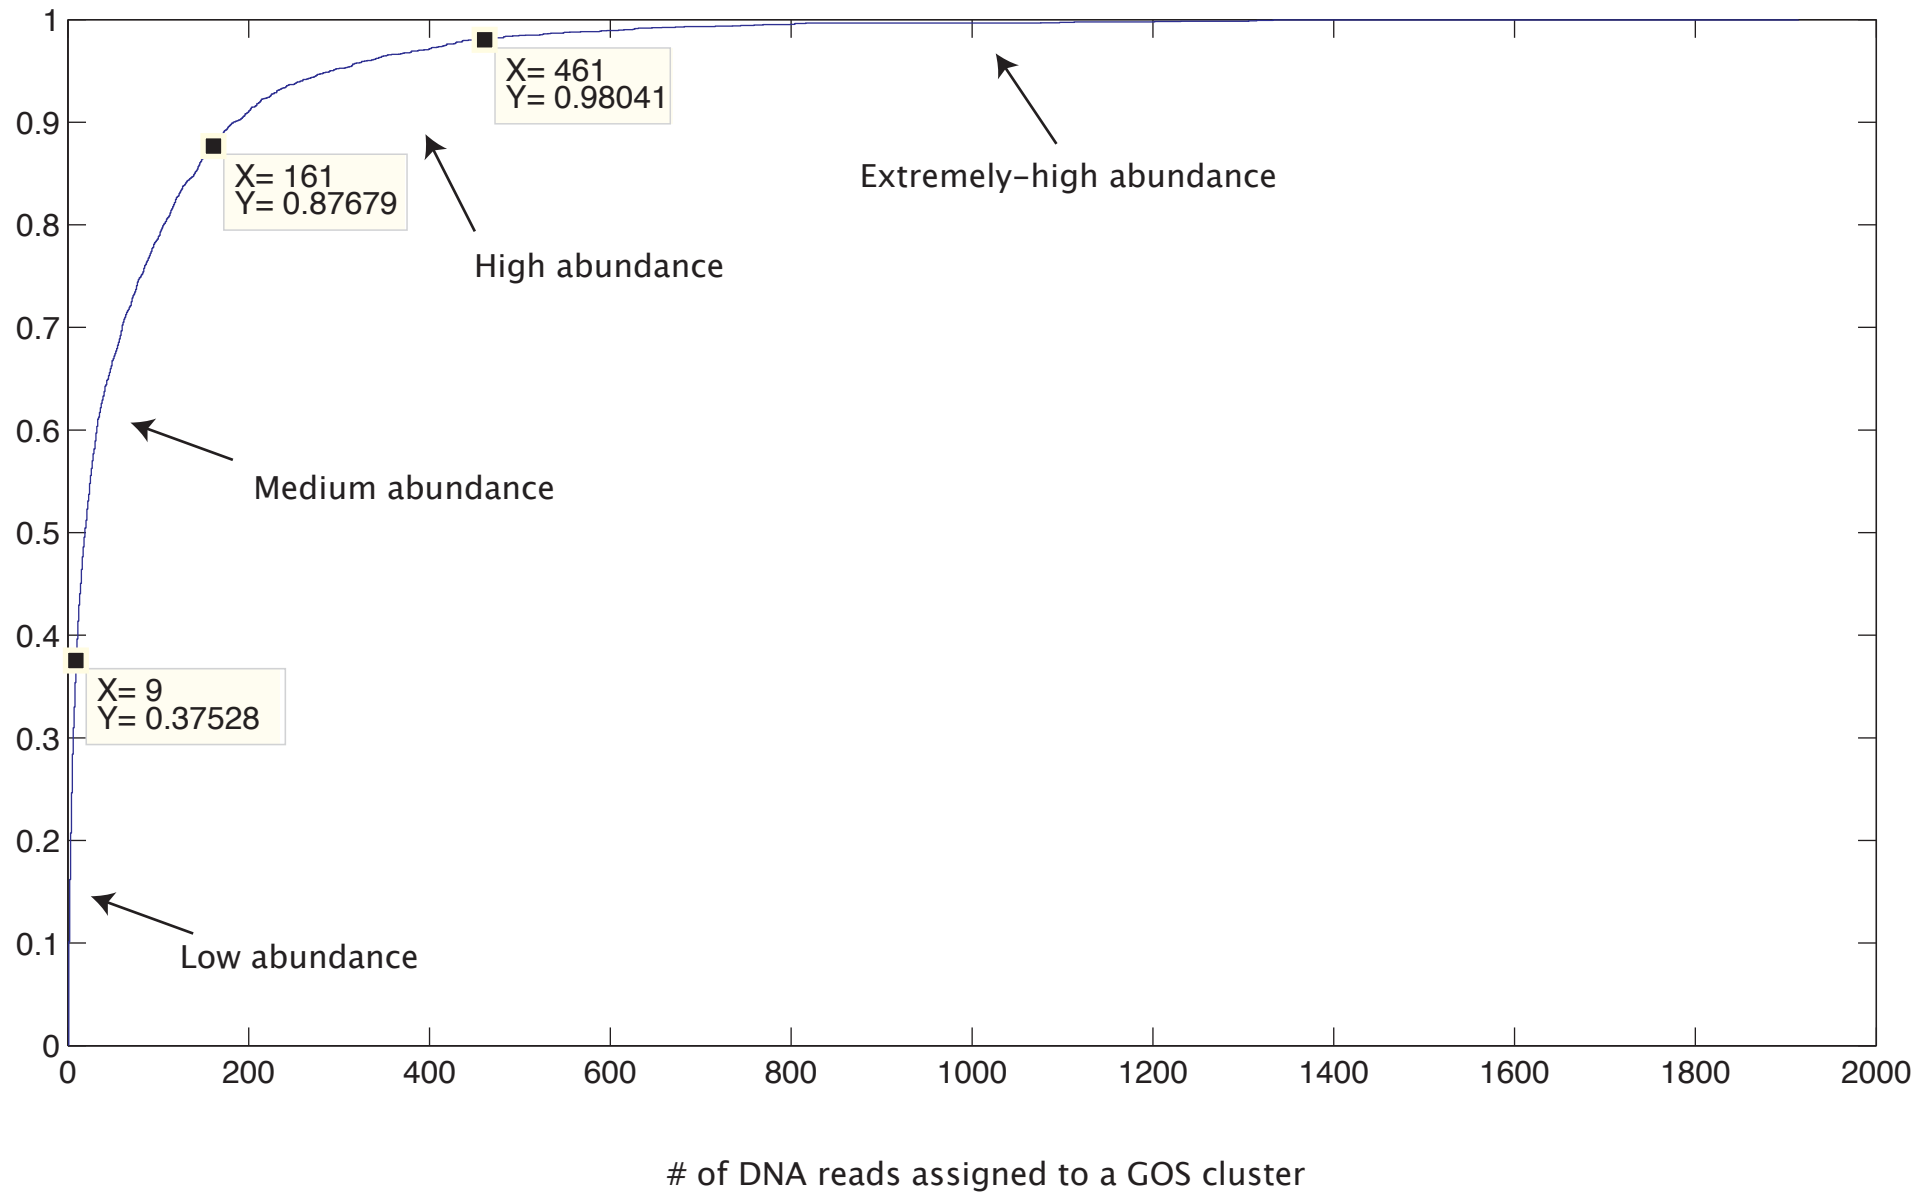

Supplement: 08897Fig11.pdf [file 08897Fig11.pdf]

# Pyrosequencing: Log10(cDNA/DNA)

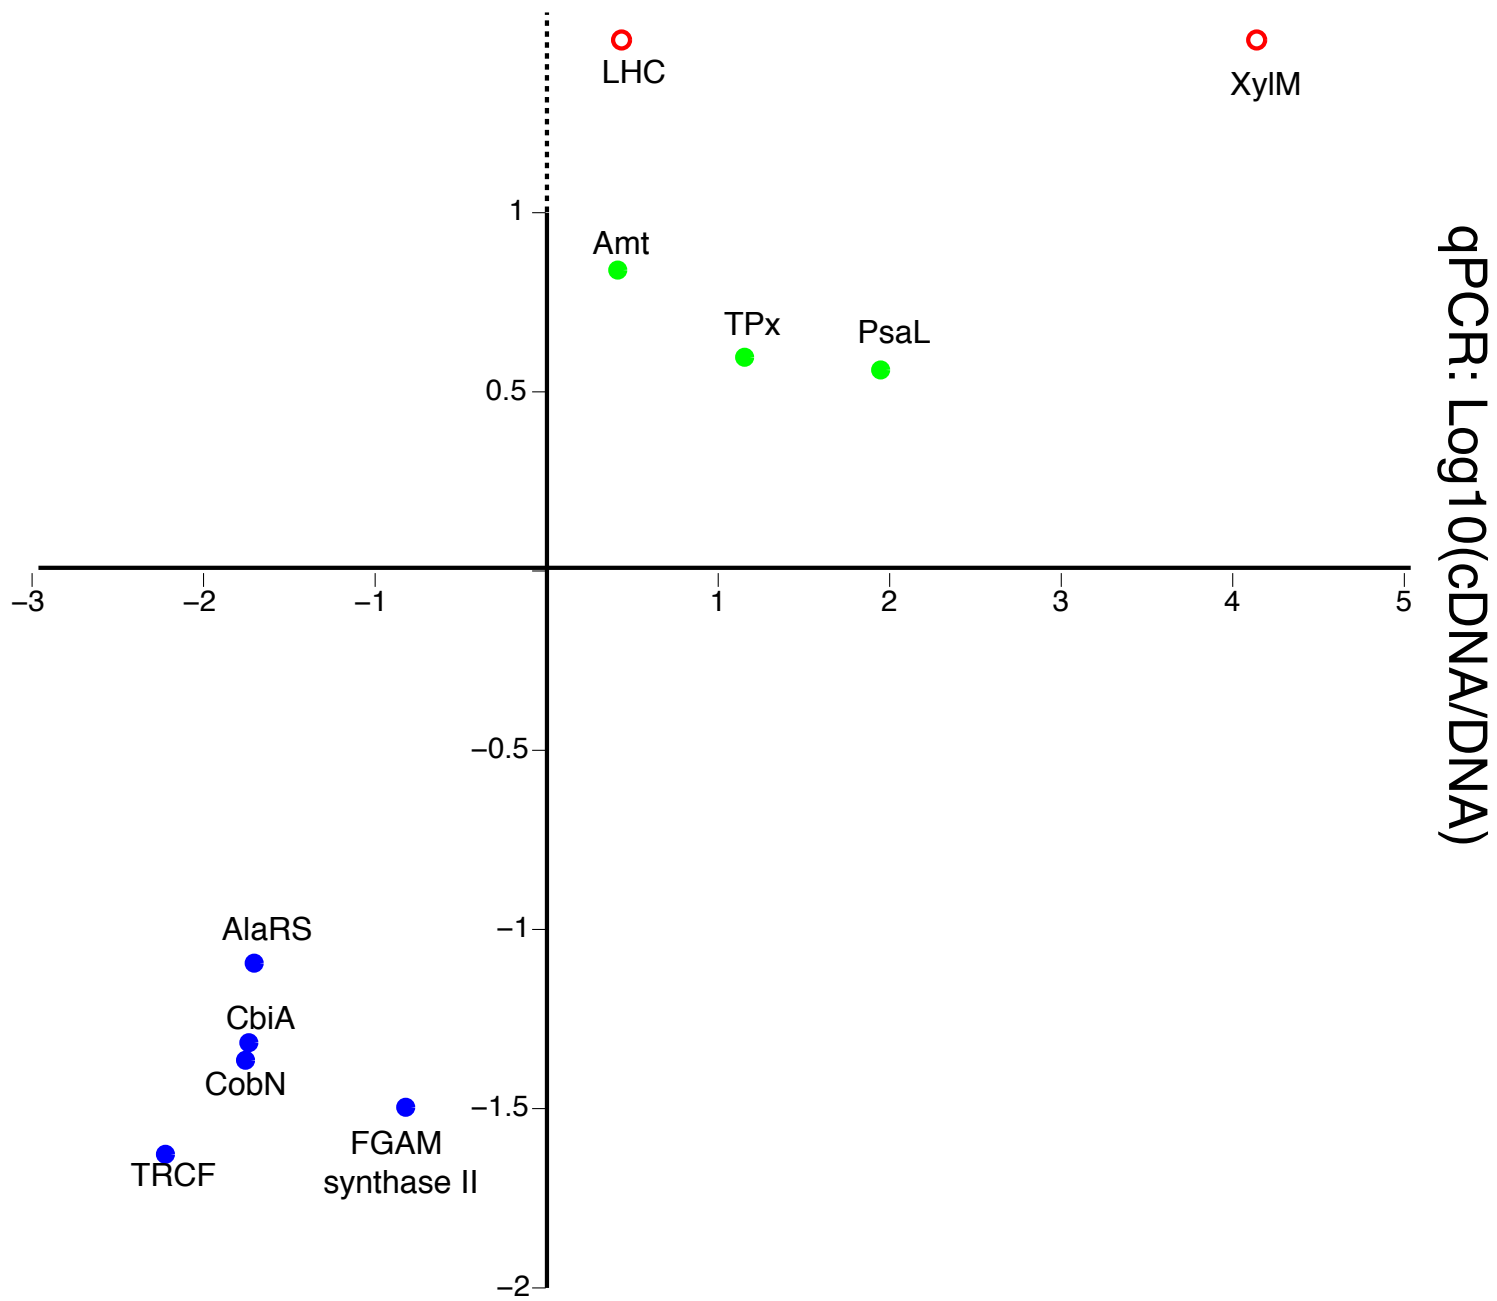

Supplement: 08897Fig9.pdf [file 08897Fig9.pdf]
